# Supplementary material
Source: PubMed Central journal article supplement (PMC4493585)
Supplement: IJHPM-4-447-s002.pdf [file IJHPM-4-447-s002.pdf]

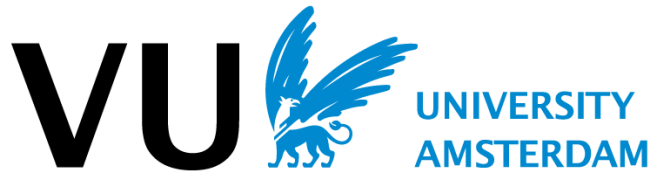

**Athena Institute for Research on Innovation  
and Communication in Health and Life Sciences**  
Faculty of Earth and Life Sciences (FALW)  
Vrije Universiteit Amsterdam  
De Boelelaan 1085  
1081 HV Amsterdam  
The Netherlands

**Primary Researcher: Laura Scheske**  
E-Mail: [l.scheske@student.vu.nl](mailto:l.scheske@student.vu.nl)  
Tel.: +31 6123 91685

## Survey on Snake Antivenoms: Production, Quality and the Implementation of WHO Guidelines

### Your Contact Details

Name of your Facility

Country

### Contact Details

Name : \_\_\_\_\_

Position : \_\_\_\_\_

E-mail : \_\_\_\_\_

Telephone : \_\_\_\_\_

Website : \_\_\_\_\_

Please fill out the survey electronically, or print it and send us a scan.

























**Thank you for taking the time to fill out our survey. The information you provided will be treated confidentially and used solely for the purpose of this study. Your input is greatly appreciated.**
