# Supplementary material
Source: PubMed Central journal article supplement (PMC4493585)
Supplement: IJHPM-4-447-s003.pdf [file IJHPM-4-447-s003.pdf]

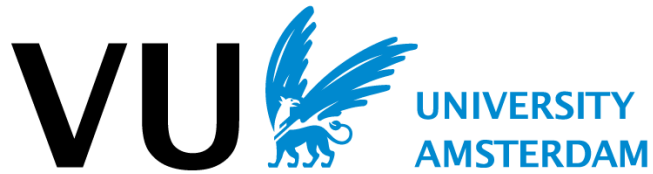

**Athena Institute for Research on Innovation  
and Communication in Health and Life Sciences**  
Faculty of Earth and Life Sciences (FALW)  
Vrije Universiteit Amsterdam  
De Boelelaan 1085  
1081 HV Amsterdam  
The Netherlands

**Primary Researcher: Laura Scheske**  
E-Mail: [l.scheske@student.vu.nl](mailto:l.scheske@student.vu.nl)  
Tel.: +31 6123 91685

## Survey on Snake Antivenoms: Epidemiology and Antivenom Availability

### Your Contact Details

Name of Poison Center

Country

### Contact Details

Name : \_\_\_\_\_

Position : \_\_\_\_\_

E-mail : \_\_\_\_\_

Telephone : \_\_\_\_\_

Website : \_\_\_\_\_

Please fill out the survey electronically, or print it and send us a scan.

## Epidemiology

1. Are snakebite envenomings considered to be a priority health issue in your country? Please rate below.

Low priority                    High priority

2. What is the most recent data regarding incidence and mortality of snakebites in your country?

N/A   Incidence \_\_\_\_\_ Mortality \_\_\_\_\_

3. Are health workers in your country specifically trained about snakebites?

Yes    No

If yes, what topics relating to snakebites are the health workers trained in? Please list:

---

---

---

---

---

---

---

---

---

---

---

---

---

---

---

---

---

---

---

---

---

---

---

---

---

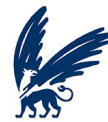

---

4. Have you been part of any types of efforts to improve the epidemiological knowledge of snakebites?

Yes

No

If yes, please describe the approaches used to improve this knowledge:

---

---

---

---

---

---

---

---

---

---

---

---

---

---

---

---

---

---

---

---

---

---

---

---

---

5. What are the species of venomous snakes found in your country? Please provide a list of their Latin names:

---

---

---

---

---

---

---

---

---

---

---

---

---

---

---

---

---

---

---

---

---

---

---

---

---



7. What are the purchasing (consumer) prices for the antivenoms used by your poison center? (in local currency)

| <b>Product name</b> | <b>Price per ampoule</b> | <b>Price per therapeutic dose</b> |
|---------------------|--------------------------|-----------------------------------|
|                     |                          |                                   |
|                     |                          |                                   |
|                     |                          |                                   |
|                     |                          |                                   |
|                     |                          |                                   |
|                     |                          |                                   |
|                     |                          |                                   |
|                     |                          |                                   |
|                     |                          |                                   |
|                     |                          |                                   |
|                     |                          |                                   |
|                     |                          |                                   |
|                     |                          |                                   |
|                     |                          |                                   |
|                     |                          |                                   |
|                     |                          |                                   |
|                     |                          |                                   |
|                     |                          |                                   |
|                     |                          |                                   |
|                     |                          |                                   |
|                     |                          |                                   |
|                     |                          |                                   |
|                     |                          |                                   |
|                     |                          |                                   |
|                     |                          |                                   |
|                     |                          |                                   |

**Thank you for taking the time to fill out our survey. The information you provided will be treated confidentially and used solely for the purpose of this study. Your input is greatly appreciated.**
